# Supplementary material for: The Ability of Airborne Microalgae and Cyanobacteria to Survive and Transfer the Carcinogenic Benzo(a)pyrene in Coastal Regions
Source: MDPI journal article supplement (doi:10.3390/cells12071073), 2023-04-02
Supplement: s1 [file s1]

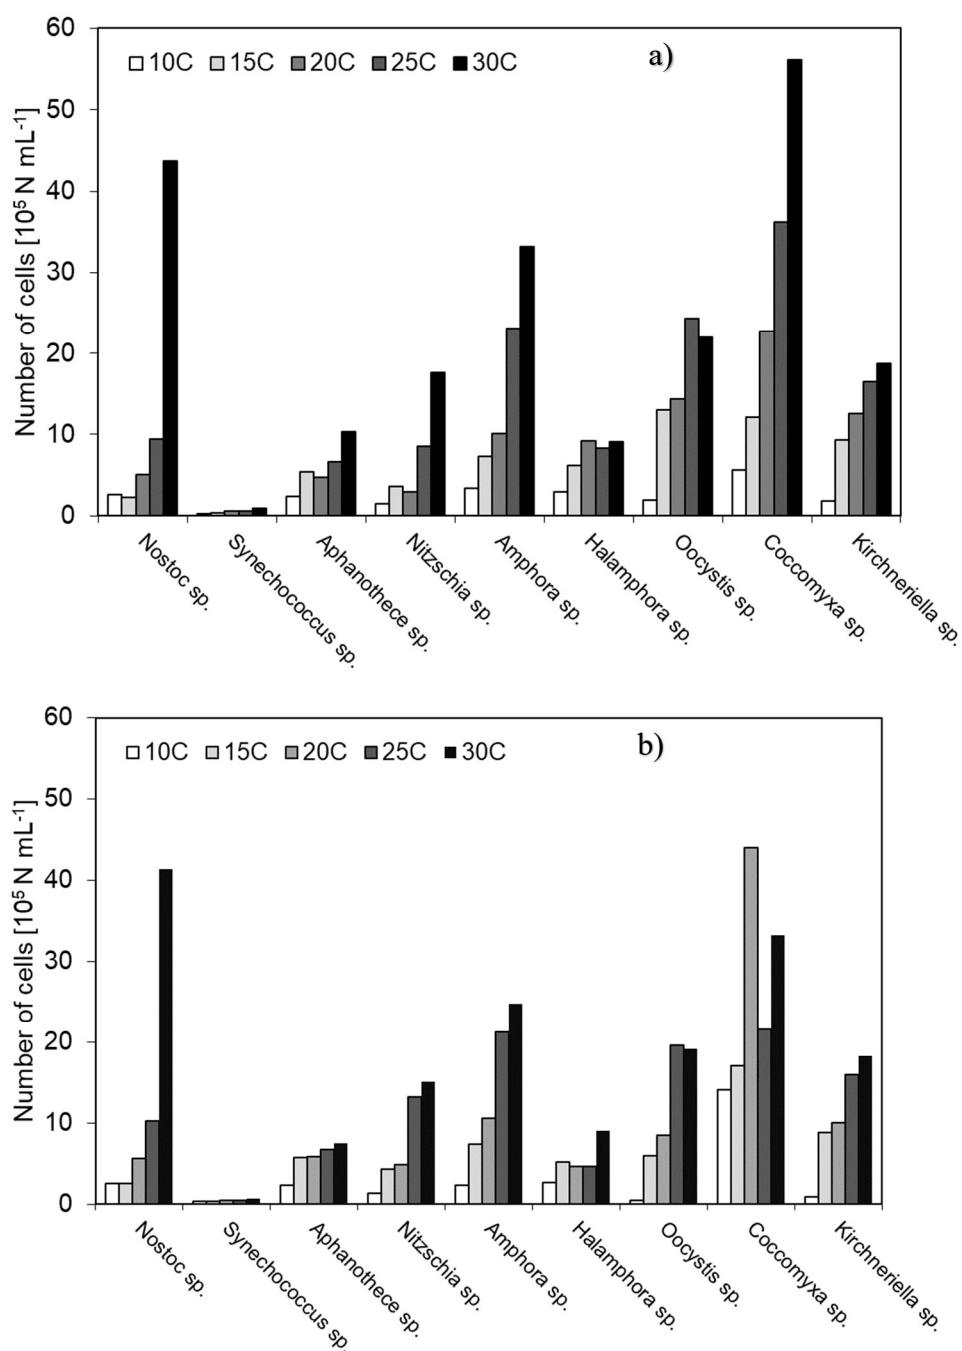

**Fig. S1.** Variability of cyanobacteria and microalgae quantity with respect to sample incubation temperature a) in the presence of B(a)P b) without B(a)P.

**Table S1.** The average, minimum and maximum cell quantities for individual strains after 7 days of B(a)P exposition and without B(a)P exposition.

| <i>Nostoc sp.</i> | <i>Synechococcus sp.</i> | <i>Aphanothece sp.</i> | <i>Nitzschia sp.</i> | <i>Amphora sp.</i> | <i>Halamphora sp.</i> | <i>Oocystis sp.</i> | <i>Coccomyxa sp.</i> | <i>Kirchneriella sp.</i> |
|-------------------|--------------------------|------------------------|----------------------|--------------------|-----------------------|---------------------|----------------------|--------------------------|
|                   |                          |                        |                      |                    |                       |                     |                      |                          |

| Number of cells after adding B(a)P [ $\cdot 10^5$ N x mL <sup>-1</sup> ] |      |     |      |      |      |      |      |      |       |
|--------------------------------------------------------------------------|------|-----|------|------|------|------|------|------|-------|
| Av.                                                                      | 12.6 | 0.5 | 5.9  | 6.8  | 15.4 | 7.2  | 15.2 | 26.5 | 11.8  |
| Min.                                                                     | 1.9  | 0.2 | 1.7  | 1.4  | 3.2  | 2.7  | 1.0  | 5.0  | 1.5   |
| Max                                                                      | 46.1 | 1.0 | 12.2 | 22.0 | 37.4 | 10.4 | 27.2 | 73.0 | 22.6  |
| Number of cells without B(a)P [ $\cdot 10^5$ N x mL <sup>-1</sup> ]      |      |     |      |      |      |      |      |      |       |
| Av.                                                                      | 12.5 | 0.4 | 5.6  | 7.8  | 13.2 | 5.2  | 10.7 | 26.0 | 10.78 |
| Min.                                                                     | 2.6  | 0.3 | 2.3  | 1.3  | 2.3  | 2.6  | 0.4  | 14.1 | 0.9   |
| Max                                                                      | 41.4 | 0.7 | 7.5  | 15.1 | 24.7 | 9.1  | 19.6 | 44.0 | 18.2  |

**Table S2.** Three-way factorial ANOVA of cells concentration, fluorescence and pigment content measured in tested strains growing at different temperatures (0°C) and B(a)P concentration (ng mL<sup>-1</sup>) in the range of 0 to 7.8 ng mL<sup>-1</sup>: df – degrees of freedom; F – Fisher's F-test statistic; Mss – mean sum of squares; Ss – sum of squares. Levels of significance were: \*  $p < 0.05$ ; \*\*  $p < 0.01$ ; \*\*\*  $p < 0.001$ .

|                                         | SS       | Degr. of Freedom | MS       | F         | p        |
|-----------------------------------------|----------|------------------|----------|-----------|----------|
| Number of cells (cel mL <sup>-1</sup> ) |          |                  |          |           |          |
| Intercept                               | 8994.494 | 1.000            | 8994.494 | 20307.157 | 0.000*** |
| Strain                                  | 5909.914 | 8.000            | 738.739  | 1667.875  | 0.000*** |
| Temperature                             | 4084.866 | 4.000            | 1021.216 | 2305.633  | 0.000*** |
| B(a)P                                   | 20.138   | 1.000            | 20.138   | 45.467    | 0.000*** |
| Strain*Temperature                      | 7113.780 | 32.000           | 222.306  | 501.907   | 0.000*** |
| Strain*B(a)P                            | 45.220   | 8.000            | 5.653    | 12.762    | 0.000*** |
| Temperature*B(a)P                       | 26.366   | 4.000            | 6.591    | 14.882    | 0.000*** |
| Strain*Temperature*B(a)P                | 130.340  | 32.000           | 4.073    | 9.196     | 0.000*** |
| Error                                   | 79.726   | 180.000          | 0.443    |           |          |
| Fluorescence (Fv/Fm)                    |          |                  |          |           |          |
| Intercept                               | 93.778   | 1.000            | 93.778   | 35179.892 | 0.000*** |
| Strain                                  | 5.818    | 8.000            | 0.727    | 272.799   | 0.000*** |
| Temperature                             | 2.352    | 4.000            | 0.588    | 220.598   | 0.000*** |
| B(a)P                                   | 0.011    | 1.000            | 0.011    | 4.163     | 0.043*   |
| Strain*Temperature                      | 0.920    | 32.000           | 0.029    | 10.790    | 0.000*** |
| Strain*B(a)P                            | 0.072    | 8.000            | 0.009    | 3.360     | 0.001**  |
| Temperature*B(a)P                       | 0.070    | 4.000            | 0.017    | 6.546     | 0.000*** |
| Strain*Temperature*B(a)P                | 0.170    | 32.000           | 0.005    | 1.990     | 0.003**  |
| Error                                   | 0.480    | 180.000          | 0.003    |           |          |
| Chl <i>a</i> (ng cel <sup>-1</sup> )    |          |                  |          |           |          |
| Intercept                               | 1444.490 | 1.000            | 1444.490 | 5981.596  | 0.000*** |
| Strain                                  | 4721.586 | 8.000            | 590.198  | 2443.996  | 0.000*** |
| Temperature                             | 69.140   | 4.000            | 17.285   | 71.576    | 0.000*** |
| B(a)P                                   | 0.768    | 1.000            | 0.768    | 3.181     | 0.076    |
| Strain*Temperature                      | 435.580  | 32.000           | 13.612   | 56.366    | 0.000*** |
| Strain*B(a)P                            | 1.163    | 8.000            | 0.145    | 0.602     | 0.775    |
| Temperature*B(a)P                       | 5.298    | 4.000            | 1.325    | 5.485     | 0.000*** |
| Strain*Temperature*B(A)P                | 38.964   | 32.000           | 1.218    | 5.042     | 0.000*** |
| Error                                   | 43.468   | 180              | 0.241    |           |          |

**Table S3.** The average, minimum and maximum chlorophyll *a* for individual strains after 7 days of B(a)P exposition and without B(a)P exposition

|                                                           | <i>Nostoc</i> sp. | <i>Synechococcus</i> sp. | <i>Aphanotheca</i> sp. | <i>Nitzschia</i> sp. | <i>Amphora</i> sp. | <i>Halamphora</i> sp. | <i>Oocystis</i> sp. | <i>Coccomyxa</i> sp. | <i>Kirchneriella</i> sp. |
|-----------------------------------------------------------|-------------------|--------------------------|------------------------|----------------------|--------------------|-----------------------|---------------------|----------------------|--------------------------|
| Chl <i>a</i> after adding B(a)P [ng cell <sup>-1</sup> ]  |                   |                          |                        |                      |                    |                       |                     |                      |                          |
| Av.                                                       | 15.2              | 47.1                     | 3.8                    | 24.2                 | 29.8               | 9.0                   | 5.7                 | 4.3                  | 12.2                     |
| Min.                                                      | 1.4               | 5.2                      | 1.2                    | 0                    | 0                  | 0                     | 1.8                 | 0                    | 9.1                      |
| Max                                                       | 38.2              | 98.8                     | 13.1                   | 64.0                 | 70.5               | 37.9                  | 11.0                | 8.23                 | 16.2                     |
| Chl <i>a</i> cells without B(a)P [ng cell <sup>-1</sup> ] |                   |                          |                        |                      |                    |                       |                     |                      |                          |
| Av.                                                       | 18.6              | 55.9                     | 7.1                    | 24.7                 | 33.7               | 16.3                  | 6.7                 | 18.4                 | 12.8                     |
| Min.                                                      | 0.7               | 20.1                     | 2.0                    | 6.4                  | 2.6                | 0                     | 2.1                 | 3.0                  | 7.7                      |
| Max                                                       | 38.2              | 94.0                     | 19.1                   | 41.7                 | 55.0               | 37.9                  | 13.2                | 48.2                 | 16.5                     |

**Table S4.** The average, minimum and maximum Fv/Fm for individual strains after 7 days of B(a)P exposition and without B(a)P exposition

|                           | <i>Nostoc</i> sp. | <i>Synechococcus</i> sp. | <i>Aphanotheca</i> sp. | <i>Nitzschia</i> sp. | <i>Amphora</i> sp. | <i>Halamphora</i> sp. | <i>Oocystis</i> sp. | <i>Coccomyxa</i> sp. | <i>Kirchneriella</i> sp. |
|---------------------------|-------------------|--------------------------|------------------------|----------------------|--------------------|-----------------------|---------------------|----------------------|--------------------------|
| Fv/Fm after adding B(a)P  |                   |                          |                        |                      |                    |                       |                     |                      |                          |
| Av.                       | 0.5               | 0.4                      | 0.4                    | 0.5                  | 0.6                | 0.4                   | 0.8                 | 0.6                  | 0.8                      |
| Min.                      | 0.2               | 0.2                      | 0.2                    | 0.3                  | 0.2                | 0.2                   | 0.6                 | 0.4                  | 0.6                      |
| Max                       | 0.6               | 0.5                      | 0.5                    | 0.8                  | 0.8                | 0.6                   | 0.9                 | 0.8                  | 0.9                      |
| Fv/Fm cells without B(a)P |                   |                          |                        |                      |                    |                       |                     |                      |                          |
| Av.                       | 0.5               | 0.4                      | 0.4                    | 0.7                  | 0.6                | 0.5                   | 0.8                 | 0.6                  | 0.8                      |
| Min.                      | 0.4               | 0.2                      | 0.3                    | 0.4                  | 0.2                | 0.5                   | 0.5                 | 0.5                  | 0.5                      |
| Max                       | 0.6               | 0.5                      | 0.5                    | 0.8                  | 0.8                | 0.5                   | 0.9                 | 0.7                  | 0.9                      |

**Table S5.** The average content of B(a)P [ng mL<sup>-1</sup>] after 7 days of exposure

| Added B(a)P [ng mL <sup>-1</sup> ]                                    | <i>Nostoc</i> sp. | <i>Synechococcus</i> sp. | <i>Aphanotheca</i> sp. | <i>Nitzschia</i> sp. | <i>Amphora</i> sp. | <i>Halamphora</i> sp. | <i>Oocystis</i> sp. | <i>Coccomyxa</i> sp. | <i>Kirchneriella</i> sp. | Blank sample |
|-----------------------------------------------------------------------|-------------------|--------------------------|------------------------|----------------------|--------------------|-----------------------|---------------------|----------------------|--------------------------|--------------|
| B(a)P concentration after 7 days of exposition [ng mL <sup>-1</sup> ] |                   |                          |                        |                      |                    |                       |                     |                      |                          |              |
| 7.8                                                                   | 3.6               | 3.0                      | 1.4                    | 4.1                  | 2.1                | 1.3                   | 2.2                 | 1.6                  | 1.5                      | 2.1          |
| 15                                                                    | 9.5               | 3.2                      | 5.1                    | 2.3                  | 2.3                | 1.9                   | 0.9                 | 0.9                  | 2.0                      | 6.5          |
| 78                                                                    | 10.8              | 9.5                      | 10.5                   | 10.6                 | 13.8               | 7.9                   | 3.2                 | 5.6                  | 1.1                      | 10.0         |
| 312                                                                   | 22.3              | 14.2                     | 30.1                   | 15.8                 | 14.9               | 29.2                  | 6.9                 | 10.6                 | 6.2                      | 19.0         |
| 624                                                                   | 25.9              | 37.1                     | 74.8                   | 43.8                 | 37.5               | 70.1                  | 17.8                | 17.6                 | 5.6                      | 48.2         |

**Table S6.** Two-way factorial ANOVA of B(a)P concentration after 7 days of exposure for tested taxa (divided as group of cyanobacteria, green algae, and diatoms): df – degrees of

freedom; F – Fisher's F-test statistic; Mss – mean sum of squares; Ss – sum of squares. Levels of significance were: \*  $p < 0.05$ ; \*\*  $p < 0.01$ ; \*\*\*  $p < 0.001$ .

|                                                                     | SS       | Degr. of<br>Freedom | MS       | F       | p        |
|---------------------------------------------------------------------|----------|---------------------|----------|---------|----------|
| B(a)P concentration after 7 days of exposure (ng mL <sup>-1</sup> ) |          |                     |          |         |          |
| Intercept                                                           | 8076.261 | 1.000               | 8076.261 | 102.298 | 0.000*** |
| B(A)P                                                               | 7278.184 | 4.000               | 1819.546 | 23.047  | 0.000*** |
| Strain                                                              | 1368.927 | 2.000               | 684.463  | 8.670   | 0.001**  |
| B(A)P*Strain                                                        | 1528.676 | 8.000               | 191.085  | 2.420   | 0.038*   |
| Error                                                               | 2368.448 | 30.000              | 78.948   |         |          |
